# Supplementary material
Source: Royal Society of Chemistry journal article supplement (doi:10.1039/d5va00415b)
Supplement: d5va00415b1.xlsx [file d5va00415b1.xlsx]

## Sheet: ATP
	ATP
	Exp A (steady state)	Exp B (20 kPa)	Exp C (40 kPa)
IBB	558.381
CONTROL	0.104286
DW	0.055
0	0.153333	0.396667	0.365
1 day	110.35	224.147	0.475
7 days	427.407	485.94	617.467
14 days	543.767	510.347	465.303
21 days	914.877	1254.35	547.423
28 days	1004.71	1345.43	511.75
FS	1145.66	1174.53	688.887

## Sheet: VSS
	VSS
	Exp A (steady state)	Exp B (20 kPa)	Exp C (40 kPa)
7 days	0.120048	0.188917	0.247964
14 days	0.423216	0.412655	0.446449
21 days	0.545852	0.474215	0.717793
28 days	0.519031	0.57971	0.714413
FS	0.555556	0.248911	1.09564

## Sheet: Flowcytometer - pipe wall
		Flowcytometer - pipe wall (Cells/cm²)
		Exp A (steady state)	Exp B (20 kPa)	Exp C (40 kPa)
14d	INLT	38746	62446	42877.2
14d	MIDPT	41951.1	63461.1	39939.3
14d	MID-SPRGLN	25141.9	14726.8	29475.9
14d	MID-OBV	7732.69	33111.9	20596.5
14d	OUTLT	38143	62540	35962
28d	INLT	91700.7	38765.6	37649.5
28d	MIDPT	22744	51117	41389.1
28d	MID-SPRGLN	29576.8	49431	26044.2
28d	MID-OBV	41003.4	28108	12904.4
28d	OUTLT	48607.1	54861.9	21299.9
FS	INLT	8506.21	60308.6	14982.4
FS	MIDPT	10026.3	24709	27251.3
FS	MID-SPRGLN	11233	10177.6	17583.2
FS	MID-OBV	20540.1	4782.8	10439.3
FS	OUTLT	12280.6	36581	32439.2

## Sheet: Flowcytometer - bulk water
	Flowcytometer - bulk water (Cells/mL)
	Exp A (steady state)	Exp B (20 kPa)	Exp C (40 kPa)
IBB	322507	322507	545458
CONTROL	146.466	146.466	2372.17
DW	208.872	208.872	208.872
0	303.503	212.653	41.2201
1 day	1347.97	826.007	41.4602
7 days	7869.44	7501.57	1057.26
14 days	13341	16246.3	5240.45
21 days	4700.81	8079.07	13100.8
28 days	14952.7	45252.1	7932.36
FS	20882.6	21382.1	9506.41
